# Supplementary material for: Evaluation of the effect of a communication skills course on medical students’ attitude towards patient-centered care: a prospective study
Source: PeerJ journal article supplement (doi:10.7717/peerj.18676), 2024-12-09
Supplement: PPOS_questionnaire.pdf [file PPOS_questionnaire.pdf]

**PPOS communication skills questionnaire (Yr4-F)**

Fill in a X for each item/question in the appropriate box of agreement

|    | ITEM                                                                                                                    |        | Strongly agree | Somewh at agree | Agree | Disagree | Somewhat disagree | Strongly disagree |
|----|-------------------------------------------------------------------------------------------------------------------------|--------|----------------|-----------------|-------|----------|-------------------|-------------------|
| 1  | The doctor is the one who should decide what gets talked about during a visit                                           | PPOS01 |                |                 |       |          |                   |                   |
| 2  | Although health care is less personal these days, this is a small price to pay for medical advances.                    | PPOS02 |                |                 |       |          |                   |                   |
| 3  | The most important part of the standard medical visit is the physical examination.                                      | PPOS03 |                |                 |       |          |                   |                   |
| 4  | It is often best for patients if they do not have a full explanation of their medical condition.                        | PPOS04 |                |                 |       |          |                   |                   |
| 5  | Patients should rely on their doctors' knowledge and not try to find out about their conditions on their own.           | PPOS05 |                |                 |       |          |                   |                   |
| 6  | When doctors ask a lot of questions about a patient's background, they are prying too much into personal matters        | PPOS06 |                |                 |       |          |                   |                   |
| 7  | If doctors are truly good at diagnosis and treatment, the way they relate to patients is not that important.            | PPOS07 |                |                 |       |          |                   |                   |
| 8  | Many patients continue asking questions even though they are not learning anything new.                                 | PPOS08 |                |                 |       |          |                   |                   |
| 9  | Patients should be treated as if they were partners with the doctor, equal in power and status.                         | PPOS09 |                |                 |       |          |                   |                   |
| 10 | Patients generally want reassurance rather than information about their health.                                         | PPOS10 |                |                 |       |          |                   |                   |
| 11 | If a doctor's primary tools are being open and warm, the doctor will not have a lot of success.                         | PPOS11 |                |                 |       |          |                   |                   |
| 12 | When patients disagree with their doctor, this is a sign that the doctor does not have the patient's respect and trust. | PPOS12 |                |                 |       |          |                   |                   |
| 13 | A treatment plan cannot succeed if it conflicts with a patient's lifestyle or values.                                   | PPOS13 |                |                 |       |          |                   |                   |
| 14 | Most patients want to get in and out of the doctor's office as quickly as possible                                      | PPOS14 |                |                 |       |          |                   |                   |
| 15 | The patient must always be aware that the doctor is in charge.                                                          | PPOS15 |                |                 |       |          |                   |                   |
| 16 | It is not that important to know a patient's culture and background in order to treat the person's illness              | PPOS16 |                |                 |       |          |                   |                   |
| 17 | Humour is a major ingredient in the doctor's treatment of the patient.                                                  | PPOS17 |                |                 |       |          |                   |                   |
| 18 | When patients look up medical information on their own, this usually confuses more than it helps.                       | PPOS18 |                |                 |       |          |                   |                   |
