# Supplementary material for: Evaluation of the effect of a communication skills course on medical students’ attitude towards patient-centered care: a prospective study
Source: PeerJ. 2024 Dec 9;12:e18676. doi: 10.7717/peerj.18676 (PMC11636530; doi:10.7717/peerj.18676)
Supplement: Supplemental Information 1 [file peerj-12-18676-s001.xlsx]

## Sheet: Data_Dr.Khaled
Year	Gender	Canddaite	PPOS01_b	PPOS02_b	PPOS03_b	PPOS04_b	PPOS05_b	PPOS06_b	PPOS07_b	PPOS08_b	PPOS09_b	PPOS10_b	PPOS11_b	PPOS12_b	PPOS13_b	PPOS14_b	PPOS15_b	PPOS16_b	PPOS17_b	PPOS18_b	Sharing	Caring	Overall	Transformed_Sharing	Transformed_Caring	Transformed_Overall
1	1	M1	1	4	3	3	6	4	6	2	5	1	1	4	4	3	6	2	5	4	32	32	64	3.55556	3.55556	3.55556
1	1	M2	3	2	3	2	2	5	4	4	2	1	6	3	5	3	3	6	4	4	24	38	62	2.66667	4.22222	3.44444
1	1	M3	5	3	4	5	5	5	4	2	2	4	4	4	2	5	3	6	2	2	32	35	67	3.55556	3.88889	3.72222
1	1	M4	4	3	4	6	2	5	6	3	4	2	5	1	1	5	3	4	4	3	28	37	65	3.11111	4.11111	3.61111
1	1	M5	2	5	3	4	3	5	4	5	3	2	6	4	2	1	3	4	5	3	29	35	64	3.22222	3.88889	3.55556
1	1	M6	2	6	4	6	3	4	4	4	3	1	6	6	6	4	2	5	4	4	31	43	74	3.44444	4.77778	4.11111
1	1	M7	2	6	3	2	6	5	4	4	3	5	4	4	6	2	5	4	5	3	34	39	73	3.77778	4.33333	4.05556
1	1	M8	3	3	4	5	3	6	6	1	4	1	2	2	4	3	3	4	4	2	24	36	60	2.66667	4	3.33333
1	1	M9	1	3	2	5	2	5	5	3	2	2	5	5	5	6	2	6	2	2	24	39	63	2.66667	4.33333	3.5
1	1	M10	2	6	5	6	2	6	6	2	5	3	6	6	4	1	3	6	6	3	32	46	78	3.55556	5.11111	4.33333
1	1	M11	2	5	5	6	1	6	5	3	1	4	5	2	5	5	2	6	4	3	24	46	70	2.66667	5.11111	3.88889
1	1	M12	4	6	5	6	1	3	6	5	1	2	6	4	5	4	4	6	4	3	30	45	75	3.33333	5	4.16667
1	1	M13	2	1	4	6	3	4	6	2	6	1	4	3	4	1	2	6	3	3	28	33	61	3.11111	3.66667	3.38889
1	1	M14	3	4	3	6	2	5	4	4	2	2	6	3	5	4	2	6	4	4	28	41	69	3.11111	4.55556	3.83333
1	1	M15	5	6	4	5	1	2	6	2	6	1	6	6	4	3	3	2	6	3	32	39	71	3.55556	4.33333	3.94444
1	1	M16	1	5	4	3	3	4	4	2	3	2	4	1	4	3	4	5	4	3	22	37	59	2.44444	4.11111	3.27778
1	1	M17	2	3	4	3	4	2	6	3	4	2	6	2	6	3	2	5	4	3	25	39	64	2.77778	4.33333	3.55556
1	1	M18	5	5	3	3	2	3	5	4	2	3	3	4	5	2	3	5	4	2	28	35	63	3.11111	3.88889	3.5
1	1	M19	5	6	6	1	6	6	6	1	4	1	1	6	6	1	1	6	1	1	26	39	65	2.88889	4.33333	3.61111
1	1	M20	1	3	4	6	6	6	6	2	6	1	1	1	6	3	1	6	6	2	26	41	67	2.88889	4.55556	3.72222
1	1	M21	1	4	3	6	6	6	6	3	3	1	3	3	4	3	4	2	2	1	28	33	61	3.11111	3.66667	3.38889
1	1	M22	3	2	1	2	1	5	4	3	5	1	5	2	4	1	2	5	6	3	22	33	55	2.44444	3.66667	3.05556
1	1	M23	3	6	3	2	4	4	2	4	6	2	2	1	4	3	6	5	4	6	34	33	67	3.77778	3.66667	3.72222
1	1	M24	1	3	2	6	3	6	4	4	1	2	5	4	5	3	2	6	4	3	26	38	64	2.88889	4.22222	3.55556
1	1	M25	3	3	3	3	2	4	4	3	4	3	2	4	3	4	3	4	5	4	29	32	61	3.22222	3.55556	3.38889
1	1	M26	6	1	5	5	4	6	6	4	2	1	5	5	5	1	4	6	4	2	33	39	72	3.66667	4.33333	4
1	1	M27	2	3	3	6	3	4	6	2	3	1	1	2	6	2	2	6	3	1	22	34	56	2.44444	3.77778	3.11111
1	1	M28	1	1	3	2	5	6	6	3	4	2	4	4	3	1	1	6	4	2	24	34	58	2.66667	3.77778	3.22222
1	1	M29	1	4	3	4	4	3	3	1	4	3	6	3	3	1	2	6	6	3	25	35	60	2.77778	3.88889	3.33333
1	1	M30	4	4	4	4	4	3	3	1	6	1	6	5	2	5	6	0	3	2	33	30	63	3.66667	3.33333	3.5
1	1	M31	6	6	1	6	1	5	6	4	1	3	6	4	6	1	1	6	1	2	28	38	66	3.11111	4.22222	3.66667
1	1	M32	3	4	3	4	5	4	5	5	4	3	4	4	6	3	3	4	4	3	34	37	71	3.77778	4.11111	3.94444
1	1	M33	4	3	2	3	2	3	0	3	4	1	5	3	4	4	2	4	4	3	25	29	54	2.77778	3.22222	3
1	1	M34	4	2	5	6	5	4	5	3	4	1	4	4	3	1	4	6	5	4	35	35	70	3.88889	3.88889	3.88889
1	1	M35	3	4	3	4	4	5	6	4	5	4	6	5	6	3	3	5	4	2	34	42	76	3.77778	4.66667	4.22222
1	1	M36	3	2	3	5	1	2	3	4	2	1	6	4	5	4	2	5	6	3	25	36	61	2.77778	4	3.38889
1	1	M37	3	4	2	6	5	4	4	4	3	2	4	4	4	2	4	4	2	4	35	30	65	3.88889	3.33333	3.61111
1	1	M38	3	2	2	4	1	5	6	4	3	2	4	6	3	3	2	4	6	5	30	35	65	3.33333	3.88889	3.61111
1	1	M39	4	3	6	5	6	4	4	3	1	4	5	5	4	4	4	3	2	4	36	35	71	4	3.88889	3.94444
1	1	M40	2	4	3	6	5	5	5	4	4	3	4	3	5	3	3	4	5	5	35	38	73	3.88889	4.22222	4.05556
1	1	M41	1	2	3	5	1	2	4	1	1	2	5	3	6	4	3	6	4	2	19	36	55	2.11111	4	3.05556
1	1	M42	3	5	3	6	1	4	6	3	5	2	2	4	6	5	1	5	2	3	28	38	66	3.11111	4.22222	3.66667
1	1	M43	3	4	2	5	2	4	5	5	2	3	2	5	2	3	3	4	4	3	31	30	61	3.44444	3.33333	3.38889
1	1	M44	6	2	4	4	5	6	4	3	2	3	6	3	4	4	3	5	1	3	32	36	68	3.55556	4	3.77778
1	1	M45	2	4	2	4	2	4	5	3	5	3	5	5	4	5	4	5	5	3	31	39	70	3.44444	4.33333	3.88889
1	1	M46	4	4	3	3	4	6	4	3	4	#NULL!	6	6	#NULL!	#NULL!	#NULL!	#NULL!	#NULL!	#NULL!	#NULL!	#NULL!	#NULL!	#NULL!	#NULL!	#NULL!
1	1	M47	4	4	3	2	4	6	4	3	5	3	6	6	5	1	3	6	6	3	33	41	74	3.66667	4.55556	4.11111
1	1	M48	3	2	2	4	3	2	3	4	1	3	6	4	6	4	2	3	5	4	28	33	61	3.11111	3.66667	3.38889
1	1	M49	5	3	3	4	6	4	4	4	2	1	4	5	3	4	5	4	4	4	36	33	69	4	3.66667	3.83333
1	1	M50	4	4	4	3	4	4	6	3	3	3	6	4	4	4	3	4	4	3	30	40	70	3.33333	4.44444	3.88889
1	1	M51	3	3	2	5	4	4	3	3	2	2	5	4	6	5	3	4	5	4	30	37	67	3.33333	4.11111	3.72222
1	1	M52	3	4	1	6	3	6	6	2	2	3	5	3	5	1	2	6	6	3	27	40	67	3	4.44444	3.72222
1	1	M53	2	2	5	3	5	2	5	4	3	0	5	2	5	4	2	4	2	2	23	34	57	2.55556	3.77778	3.16667
1	1	M54	2	3	3	6	5	3	0	0	6	2	6	3	5	3	1	6	6	3	28	35	63	3.11111	3.88889	3.5
1	1	M55	5	4	2	3	4	6	6	3	5	2	5	3	5	3	2	5	4	3	30	40	70	3.33333	4.44444	3.88889
1	1	M56	2	5	3	3	6	5	6	4	6	4	3	5	6	1	6	6	5	3	39	40	79	4.33333	4.44444	4.38889
1	1	M57	2	2	2	4	4	4	4	4	3	4	1	1	6	4	1	4	6	4	27	33	60	3	3.66667	3.33333
1	1	M58	2	5	4	5	5	5	4	3	6	3	4	3	4	2	4	4	5	2	33	37	70	3.66667	4.11111	3.88889
1	1	M59	4	5	2	5	6	4	5	3	5	1	2	1	6	3	2	6	6	3	30	39	69	3.33333	4.33333	3.83333
1	1	M60	3	2	2	4	2	2	4	2	5	2	2	2	5	2	2	1	4	4	26	24	50	2.88889	2.66667	2.77778
1	1	M61	2	5	3	5	1	2	3	3	2	1	5	3	3	3	2	6	4	3	22	34	56	2.44444	3.77778	3.11111
1	1	M62	2	4	4	3	5	4	6	2	3	1	5	3	4	2	2	6	2	3	24	37	61	2.66667	4.11111	3.38889
1	1	M63	2	3	6	6	3	4	6	4	6	4	6	4	5	2	3	6	4	3	35	42	77	3.88889	4.66667	4.27778
1	1	M64	3	6	5	6	3	4	4	3	1	2	6	3	3	2	3	5	5	3	27	40	67	3	4.44444	3.72222
1	1	M65	2	1	3	6	2	4	5	2	4	1	4	4	5	3	2	5	4	3	26	34	60	2.88889	3.77778	3.33333
1	1	M66	4	6	2	3	6	5	4	5	5	1	4	6	2	3	5	6	4	4	39	36	75	4.33333	4	4.16667
1	1	M67	5	4	6	6	6	6	6	4	1	1	5	6	6	4	1	6	3	6	36	46	82	4	5.11111	4.55556
1	1	M68	5	3	6	6	1	6	3	5	6	1	6	2	6	5	6	6	4	1	33	45	78	3.66667	5	4.33333
1	1	M69	6	5	5	4	4	6	4	3	4	3	6	3	6	3	4	6	2	3	34	43	77	3.77778	4.77778	4.27778
1	1	M70	2	3	2	5	1	4	5	3	5	3	6	2	5	2	1	4	6	1	23	37	60	2.55556	4.11111	3.33333
1	1	M71	1	2	1	6	4	4	4	3	1	1	6	4	2	2	1	6	4	6	27	31	58	3	3.44444	3.22222
1	1	M72	3	3	3	6	3	4	6	3	6	4	6	5	6	1	1	6	4	4	35	39	74	3.88889	4.33333	4.11111
1	1	M73	2	4	5	1	1	4	5	4	3	3	6	5	5	3	3	5	4	1	23	41	64	2.55556	4.55556	3.55556
1	2	F1	2	3	3	2	3	2	3	2	4	3	5	2	5	0	1	2	6	1	20	29	49	2.22222	3.22222	2.72222
1	2	F2	2	2	2	4	2	4	2	2	5	2	1	2	6	2	3	4	3	4	26	26	52	2.88889	2.88889	2.88889
1	2	F3	3	5	5	4	6	5	5	5	3	4	1	5	5	3	3	5	4	4	37	38	75	4.11111	4.22222	4.16667
1	2	F4	1	3	1	1	2	1	3	1	6	3	2	3	4	1	1	1	5	3	21	21	42	2.33333	2.33333	2.33333
1	2	F5	6	5	5	4	5	3	4	4	5	2	5	4	6	3	3	6	4	4	37	41	78	4.11111	4.55556	4.33333
1	2	F6	2	4	3	3	3	4	3	3	2	2	4	5	4	2	3	6	6	2	25	36	61	2.77778	4	3.38889
1	2	F7	2	6	3	3	3	4	3	2	4	2	6	2	6	2	3	2	4	3	24	36	60	2.66667	4	3.33333
1	2	F8	2	4	2	4	4	6	4	5	3	3	4	4	6	1	2	6	4	3	30	37	67	3.33333	4.11111	3.72222
1	2	F9	5	4	2	6	2	5	6	3	1	3	5	5	6	6	4	6	4	1	30	44	74	3.33333	4.88889	4.11111
1	2	F10	1	1	2	4	1	2	6	3	4	3	3	4	6	2	1	5	5	1	22	32	54	2.44444	3.55556	3
1	2	F11	2	5	4	6	5	5	5	4	5	2	6	3	4	3	2	6	6	6	35	44	79	3.88889	4.88889	4.38889
1	2	F12	3	2	2	6	6	4	4	4	1	3	6	5	4	3	5	5	4	1	34	34	68	3.77778	3.77778	3.77778
1	2	F13	0	6	3	5	2	5	5	6	6	3	5	6	6	1	1	6	6	2	31	43	74	3.44444	4.77778	4.11111
1	2	F14	5	4	3	2	5	3	6	2	5	3	4	5	4	5	5	4	4	3	35	37	72	3.88889	4.11111	4
1	2	F15	4	2	4	3	3	4	6	4	5	3	4	5	6	4	4	6	5	3	34	41	75	3.77778	4.55556	4.16667
1	2	F16	6	3	6	6	6	6	6	6	1	2	6	6	1	3	3	6	4	2	38	41	79	4.22222	4.55556	4.38889
1	2	F17	3	3	2	2	3	4	3	4	3	1	4	4	6	3	1	2	6	4	25	33	58	2.77778	3.66667	3.22222
1	2	F18	#NULL!	#NULL!	#NULL!	#NULL!	#NULL!	#NULL!	#NULL!	#NULL!	#NULL!	#NULL!	#NULL!	#NULL!	#NULL!	#NULL!	#NULL!	#NULL!	#NULL!	#NULL!	#NULL!	#NULL!	#NULL!	#NULL!	#NULL!	#NULL!
1	2	F19	2	3	2	4	3	5	5	4	3	3	4	4	6	3	3	4	3	3	29	35	64	3.22222	3.88889	3.55556
1	2	F20	3	5	4	5	2	5	5	3	3	2	5	3	5	3	2	5	5	2	25	42	67	2.77778	4.66667	3.72222
1	2	F21	4	3	4	4	3	4	6	4	4	3	3	5	6	3	4	5	5	1	32	39	71	3.55556	4.33333	3.94444
1	2	F22	4	5	3	4	4	5	5	2	3	3	2	6	6	1	2	4	4	1	29	35	64	3.22222	3.88889	3.55556
1	2	F23	3	2	4	4	6	4	6	4	4	3	4	5	5	2	3	5	5	2	34	37	71	3.77778	4.11111	3.94444
1	2	F24	2	3	3	0	3	2	2	1	4	1	6	5	6	3	1	3	3	6	23	31	54	2.55556	3.44444	3
1	2	F25	3	4	4	6	5	4	6	3	5	1	3	4	4	3	4	5	4	1	32	37	69	3.55556	4.11111	3.83333
1	2	F26	3	6	4	5	2	4	5	3	4	1	6	4	5	3	4	5	4	2	28	42	70	3.11111	4.66667	3.88889
1	2	F27	2	4	4	3	3	5	4	4	3	4	6	3	6	4	4	5	4	3	29	42	71	3.22222	4.66667	3.94444
1	2	F28	3	4	1	4	1	2	4	2	5	1	1	3	6	4	4	4	4	1	24	30	54	2.66667	3.33333	3
1	2	F29	2	3	4	2	4	4	4	4	3	3	4	6	4	3	3	6	4	3	30	36	66	3.33333	4	3.66667
1	2	F30	2	2	3	3	4	4	4	5	2	3	5	5	6	1	3	4	6	2	29	35	64	3.22222	3.88889	3.55556
1	2	F31	3	5	4	3	6	4	6	3	3	1	4	4	5	3	4	6	5	2	29	42	71	3.22222	4.66667	3.94444
1	2	F32	3	4	3	6	6	4	5	3	3	4	6	4	4	1	1	6	4	5	35	37	72	3.88889	4.11111	4
1	2	F33	3	3	5	5	5	3	5	5	2	3	5	5	4	4	3	4	5	3	34	38	72	3.77778	4.22222	4
1	2	F34	3	4	3	6	4	5	6	3	6	3	6	4	6	4	3	4	6	1	33	44	77	3.66667	4.88889	4.27778
1	2	F35	3	4	5	3	2	5	2	0	3	5	1	4	5	1	1	6	4	1	22	33	55	2.44444	3.66667	3.05556
1	2	F36	3	4	3	3	1	4	4	3	4	3	4	4	4	3	3	4	3	3	27	33	60	3	3.66667	3.33333
1	2	F37	1	6	3	5	4	5	4	5	5	4	4	3	4	4	3	4	4	4	34	38	72	3.77778	4.22222	4
1	2	F38	2	3	2	3	4	4	4	4	5	1	6	5	3	2	3	6	6	3	30	36	66	3.33333	4	3.66667
1	2	F39	4	5	5	5	2	4	6	5	5	5	5	5	5	2	5	6	2	2	38	40	78	4.22222	4.44444	4.33333
1	2	F40	5	5	5	6	6	5	4	4	5	2	4	4	5	3	3	6	2	3	38	39	77	4.22222	4.33333	4.27778
1	2	F41	5	6	2	4	1	5	5	4	6	4	3	2	6	2	1	4	4	2	29	37	66	3.22222	4.11111	3.66667
1	2	F42	4	2	3	6	3	6	6	3	3	5	2	5	6	1	3	6	2	1	33	34	67	3.66667	3.77778	3.72222
1	2	F43	4	3	2	6	4	4	5	3	5	1	4	3	5	1	4	5	4	2	32	33	65	3.55556	3.66667	3.61111
1	2	F44	2	1	6	6	4	6	6	3	6	1	2	4	6	3	2	6	5	1	29	41	70	3.22222	4.55556	3.88889
1	2	F45	3	6	2	6	1	3	4	2	4	5	3	4	5	1	3	2	3	2	30	29	59	3.33333	3.22222	3.27778
1	2	F46	4	5	2	3	5	5	4	3	3	3	5	5	5	3	3	4	3	2	31	36	67	3.44444	4	3.72222
1	2	F47	4	5	1	4	4	3	4	2	1	4	5	6	5	2	3	2	4	1	29	31	60	3.22222	3.44444	3.33333
1	2	F48	1	4	3	6	2	2	6	1	6	1	4	3	5	2	3	6	6	2	25	38	63	2.77778	4.22222	3.5
1	2	F49	3	4	3	4	3	4	4	3	5	2	5	4	6	0	1	2	4	1	26	32	58	2.88889	3.55556	3.22222
1	2	F50	2	4	1	5	2	3	6	3	6	1	2	4	4	3	1	2	5	3	27	30	57	3	3.33333	3.16667
1	2	F51	3	2	3	6	1	2	6	2	0	2	6	6	6	2	3	6	6	1	24	39	63	2.66667	4.33333	3.5
1	2	F52	3	2	3	2	1	4	4	3	4	3	4	4	2	3	3	1	3	3	26	26	52	2.88889	2.88889	2.88889
1	2	F53	1	3	2	3	1	2	5	3	4	3	2	3	5	1	3	4	5	1	22	29	51	2.44444	3.22222	2.83333
1	2	F54	2	3	3	4	1	3	5	4	5	5	5	4	2	2	3	5	4	1	29	32	61	3.22222	3.55556	3.38889
1	2	F55	5	2	2	6	4	5	4	2	5	2	4	5	4	3	2	4	4	2	33	32	65	3.66667	3.55556	3.61111
1	2	F56	3	4	2	2	1	4	2	3	5	3	4	2	5	3	3	1	3	1	23	28	51	2.55556	3.11111	2.83333
1	2	F57	1	3	3	2	5	6	1	3	1	1	2	4	1	3	1	6	3	1	19	28	47	2.11111	3.11111	2.61111
1	2	F58	4	2	3	3	2	3	3	1	4	0	6	6	2	0	2	1	6	1	23	26	49	2.55556	2.88889	2.72222
1	2	F59	4	3	2	5	4	4	6	3	1	4	6	4	6	4	4	6	4	4	33	41	74	3.66667	4.55556	4.11111
1	2	F60	2	4	5	4	4	6	6	5	5	6	6	4	2	3	4	6	6	2	36	44	80	4	4.88889	4.44444
1	2	F61	2	3	3	4	3	4	4	2	3	2	4	2	4	4	3	4	5	3	24	35	59	2.66667	3.88889	3.27778
1	2	F62	2	3	1	3	5	4	3	6	4	1	6	1	6	4	3	6	4	1	26	37	63	2.88889	4.11111	3.5
1	2	F63	1	6	3	5	3	6	6	6	6	1	6	1	6	1	3	6	6	1	27	46	73	3	5.11111	4.05556
1	2	F64	6	6	2	6	5	6	4	3	3	3	6	5	6	4	2	6	5	1	34	45	79	3.77778	5	4.38889
1	2	F65	1	4	2	5	1	4	6	4	1	1	6	4	6	3	4	5	6	1	22	42	64	2.44444	4.66667	3.55556
1	2	F66	1	4	1	5	1	4	6	4	1	1	6	4	6	3	1	5	4	1	19	39	58	2.11111	4.33333	3.22222
1	2	F67	1	2	2	6	5	5	6	4	1	1	4	2	6	3	1	6	5	1	22	39	61	2.44444	4.33333	3.38889
1	2	F68	4	2	2	5	5	4	6	4	5	1	5	2	4	3	5	4	4	3	34	34	68	3.77778	3.77778	3.77778
1	2	F69	5	2	2	2	4	4	4	2	5	2	5	4	5	3	5	6	5	3	32	36	68	3.55556	4	3.77778
1	2	F70	4	3	2	4	3	4	6	1	4	4	4	5	6	1	3	6	6	2	30	38	68	3.33333	4.22222	3.77778
2	1	M1	0	0	0	4	6	5	6	4	5	5	6	5	4	3	2	6	5	5	36	35	71	4	3.88889	3.94444
2	1	M2	4	3	4	3	2	5	5	3	6	3	4	0	4	3	4	6	4	1	26	38	64	2.88889	4.22222	3.55556
2	1	M3	4	4	4	5	4	3	3	3	4	3	4	4	5	2	3	5	5	3	33	35	68	3.66667	3.88889	3.77778
2	1	M4	6	2	3	5	5	6	6	3	4	4	2	2	2	4	4	5	3	5	38	33	71	4.22222	3.66667	3.94444
2	1	M5	4	4	4	5	6	4	6	2	3	5	6	4	4	4	5	4	3	5	39	39	78	4.33333	4.33333	4.33333
2	1	M6	4	1	4	4	4	4	4	4	6	3	2	4	5	4	2	4	3	1	32	31	63	3.55556	3.44444	3.5
2	1	M7	6	4	4	5	4	6	5	2	3	2	1	5	6	3	4	6	6	2	33	41	74	3.66667	4.55556	4.11111
2	1	M8	4	#NULL!	4	6	6	4	4	#NULL!	#NULL!	4	#NULL!	#NULL!	#NULL!	1	#NULL!	6	#NULL!	#NULL!	#NULL!	#NULL!	#NULL!	#NULL!	#NULL!	#NULL!
2	1	M9	2	3	1	3	3	3	5	3	6	1	3	3	6	2	3	6	5	5	29	34	63	3.22222	3.77778	3.5
2	1	M10	2	5	4	4	4	4	4	2	6	2	4	5	4	3	5	3	5	5	35	36	71	3.88889	4	3.94444
2	1	M11	4	4	6	6	4	4	4	4	3	4	4	2	6	2	5	5	2	5	37	37	74	4.11111	4.11111	4.11111
2	1	M12	3	4	3	5	5	5	5	3	4	4	5	3	4	3	3	6	3	2	32	38	70	3.55556	4.22222	3.88889
2	1	M13	3	2	4	4	3	4	4	3	5	1	3	1	4	3	3	6	3	1	24	33	57	2.66667	3.66667	3.16667
2	1	M14	2	3	2	6	3	4	4	4	5	2	5	5	5	2	3	3	4	3	33	32	65	3.66667	3.55556	3.61111
2	1	M15	5	3	6	6	3	4	2	3	5	5	3	2	4	1	3	6	2	3	35	31	66	3.88889	3.44444	3.66667
2	1	M16	4	3	5	3	3	4	4	3	5	3	3	4	6	2	2	6	4	2	29	37	66	3.22222	4.11111	3.66667
2	1	M17	3	4	4	6	5	3	6	4	3	2	4	5	5	4	3	6	5	2	33	41	74	3.66667	4.55556	4.11111
2	1	M18	1	6	6	6	6	6	5	5	5	1	5	3	6	4	6	5	2	3	36	45	81	4	5	4.5
2	1	M19	4	3	1	6	4	3	3	4	4	3	3	0	3	4	0	2	5	2	27	27	54	3	3	3
2	1	M20	4	3	3	5	6	6	6	4	4	5	6	4	6	2	4	3	3	4	40	38	78	4.44444	4.22222	4.33333
2	1	M21	2	3	4	4	3	3	4	3	4	3	1	3	5	3	3	5	3	4	29	31	60	3.22222	3.44444	3.33333
2	1	M22	3	4	2	6	4	6	4	4	3	3	6	4	4	3	4	3	4	3	34	36	70	3.77778	4	3.88889
2	1	M23	2	3	3	2	3	3	4	3	4	4	3	2	4	4	2	4	5	1	23	33	56	2.55556	3.66667	3.11111
2	1	M24	4	3	5	4	1	4	5	3	4	2	3	5	5	3	3	2	5	3	29	35	64	3.22222	3.88889	3.55556
2	1	M25	2	2	2	0	6	5	6	3	5	2	2	6	0	2	3	2	5	2	29	26	55	3.22222	2.88889	3.05556
2	1	M26	6	4	6	4	4	6	6	4	6	3	4	6	6	3	4	6	4	3	40	45	85	4.44444	5	4.72222
2	1	M27	2	2	3	4	2	5	6	5	4	3	4	4	4	4	3	3	5	2	29	36	65	3.22222	4	3.61111
2	1	M28	3	5	6	4	3	4	5	3	5	4	5	4	6	3	3	5	3	2	31	42	73	3.44444	4.66667	4.05556
2	1	M29	4	2	5	3	3	2	2	0	4	4	4	3	3	0	3	3	0	3	27	21	48	3	2.33333	2.66667
2	1	M30	4	0	5	3	5	#NULL!	#NULL!	4	#NULL!	3	6	6	5	6	3	4	5	6	#NULL!	#NULL!	#NULL!	#NULL!	#NULL!	#NULL!
2	1	M31	3	4	6	6	6	5	6	4	4	3	3	3	4	4	4	3	0	4	37	35	72	4.11111	3.88889	4
2	1	M32	3	2	1	3	4	4	0	0	4	4	0	3	2	3	2	6	3	3	26	21	47	2.88889	2.33333	2.61111
2	1	M33	5	4	0	0	5	4	4	5	6	2	3	5	6	2	2	1	5	1	31	29	60	3.44444	3.22222	3.33333
2	1	M34	1	3	2	3	4	6	5	5	6	2	3	5	6	3	2	1	6	2	30	35	65	3.33333	3.88889	3.61111
2	1	M35	3	2	4	5	4	6	3	2	2	4	2	5	4	2	4	5	4	6	35	32	67	3.88889	3.55556	3.72222
2	1	M36	2	4	3	3	4	3	4	3	4	3	3	4	4	4	3	3	4	3	29	32	61	3.22222	3.55556	3.38889
2	1	M37	3	2	4	1	6	5	6	5	4	1	6	4	3	3	4	5	3	2	30	37	67	3.33333	4.11111	3.72222
2	1	M38	3	4	2	4	1	4	4	4	6	2	4	4	2	4	2	6	6	1	27	36	63	3	4	3.5
2	1	M39	4	3	2	5	4	5	3	3	5	3	4	5	4	4	3	6	4	5	37	35	72	4.11111	3.88889	4
2	1	M40	1	3	3	6	3	3	3	3	4	3	3	2	4	3	2	6	6	1	25	34	59	2.77778	3.77778	3.27778
2	1	M41	2	2	1	6	3	5	6	5	3	1	1	2	4	2	3	4	5	4	29	30	59	3.22222	3.33333	3.27778
2	1	M42	1	1	6	6	1	6	6	1	6	1	1	1	5	2	2	2	6	1	20	35	55	2.22222	3.88889	3.05556
2	1	M43	4	4	3	3	3	3	4	4	4	4	3	3	4	4	4	4	3	4	33	32	65	3.66667	3.55556	3.61111
2	1	M44	3	4	6	3	2	6	6	3	4	3	4	3	6	4	3	5	4	1	25	45	70	2.77778	5	3.88889
2	1	M45	3	5	5	0	0	6	5	5	6	1	5	6	6	1	0	6	4	4	25	43	68	2.77778	4.77778	3.77778
2	1	M46	1	3	4	3	3	5	6	3	5	4	3	6	5	2	2	4	5	1	28	37	65	3.11111	4.11111	3.61111
2	1	M47	3	3	2	2	2	3	2	3	5	3	3	3	5	2	4	4	3	4	29	27	56	3.22222	3	3.11111
2	1	M48	3	3	1	4	4	2	6	3	6	3	3	4	5	3	3	3	5	2	32	31	63	3.55556	3.44444	3.5
2	1	M49	3	3	1	2	2	3	3	3	4	3	3	2	5	2	2	2	6	2	23	28	51	2.55556	3.11111	2.83333
2	1	M50	2	0	1	6	2	3	3	3	3	1	1	1	6	1	4	6	6	1	23	27	50	2.55556	3	2.77778
2	1	M51	3	3	4	4	2	4	4	4	4	2	2	6	6	4	3	3	4	4	32	34	66	3.55556	3.77778	3.66667
2	1	M52	5	4	3	6	5	6	6	4	4	3	6	2	4	3	5	0	4	5	39	36	75	4.33333	4	4.16667
2	1	M53	3	3	6	3	3	3	3	3	4	3	3	4	4	3	3	6	4	3	29	35	64	3.22222	3.88889	3.55556
2	1	M54	3	3	2	3	5	3	3	4	5	0	2	4	0	4	2	3	3	5	31	23	54	3.44444	2.55556	3
2	1	M55	5	4	6	6	5	5	6	3	4	3	4	6	2	6	4	3	4	4	40	40	80	4.44444	4.44444	4.44444
2	1	M56	0	6	1	3	6	6	6	6	2	4	4	5	5	3	4	4	3	3	33	38	71	3.66667	4.22222	3.94444
2	1	M57	2	4	5	6	3	4	4	3	4	4	3	0	5	2	2	4	3	4	28	34	62	3.11111	3.77778	3.44444
2	1	M58	3	1	1	2	4	2	1	5	6	3	1	3	4	1	1	2	6	1	28	19	47	3.11111	2.11111	2.61111
2	1	M59	3	2	3	4	2	2	6	3	4	3	2	2	3	2	3	2	5	1	25	27	52	2.77778	3	2.88889
2	1	M60	4	3	3	3	1	2	3	3	6	1	6	4	6	1	2	1	4	1	25	29	54	2.77778	3.22222	3
2	1	M61	2	3	3	2	2	2	3	2	4	2	3	2	4	3	2	2	5	3	21	28	49	2.33333	3.11111	2.72222
2	1	M62	3	4	6	1	3	4	6	2	3	2	4	2	5	2	4	4	4	3	23	39	62	2.55556	4.33333	3.44444
2	1	M63	2	3	1	6	5	3	2	3	3	4	1	3	3	5	4	3	4	5	35	25	60	3.88889	2.77778	3.33333
2	1	M64	1	3	1	0	1	2	1	2	4	2	1	3	0	3	1	0	6	3	17	17	34	1.88889	1.88889	1.88889
2	1	M65	3	5	5	6	3	4	6	2	1	1	4	6	6	1	1	6	4	1	24	41	65	2.66667	4.55556	3.61111
2	1	M66	5	3	4	0	2	5	3	2	4	5	3	4	4	5	2	4	4	5	29	35	64	3.22222	3.88889	3.55556
2	1	M67	5	3	3	#NULL!	4	#NULL!	2	5	3	#NULL!	3	3	4	2	#NULL!	3	3	2	#NULL!	#NULL!	#NULL!	#NULL!	#NULL!	#NULL!
2	1	M68	6	3	3	3	2	3	4	2	4	4	3	2	6	1	1	3	5	1	25	31	56	2.77778	3.44444	3.11111
2	1	M69	#NULL!	#NULL!	1	1	#NULL!	2	#NULL!	1	#NULL!	1	1	1	#NULL!	1	1	1	6	1	#NULL!	#NULL!	#NULL!	#NULL!	#NULL!	#NULL!
2	2	F1	4	4	5	1	6	6	4	2	4	2	1	2	6	5	5	1	6	2	28	38	66	3.11111	4.22222	3.66667
2	2	F2	4	3	5	5	4	5	6	4	0	2	4	4	3	5	5	4	3	2	30	38	68	3.33333	4.22222	3.77778
2	2	F3	4	4	2	4	4	4	4	4	2	3	6	2	4	2	2	3	4	3	28	33	61	3.11111	3.66667	3.38889
2	2	F4	4	4	5	6	5	6	2	4	4	3	4	4	3	1	4	6	3	4	38	34	72	4.22222	3.77778	4
2	2	F5	3	6	4	5	3	4	5	5	0	4	6	6	6	4	4	1	5	1	31	41	72	3.44444	4.55556	4
2	2	F6	2	3	4	4	4	2	4	5	4	3	4	3	4	3	3	5	3	3	31	32	63	3.44444	3.55556	3.5
2	2	F7	4	3	2	6	4	4	4	4	4	2	2	4	4	3	3	4	5	3	34	31	65	3.77778	3.44444	3.61111
2	2	F8	3	4	4	3	4	4	4	4	2	3	4	5	4	3	3	5	3	3	30	35	65	3.33333	3.88889	3.61111
2	2	F9	4	4	4	4	4	4	4	5	4	3	4	4	3	3	3	4	3	4	35	33	68	3.88889	3.66667	3.77778
2	2	F10	#NULL!	#NULL!	#NULL!	#NULL!	#NULL!	#NULL!	#NULL!	#NULL!	#NULL!	#NULL!	#NULL!	#NULL!	#NULL!	#NULL!	#NULL!	#NULL!	#NULL!	#NULL!	#NULL!	#NULL!	#NULL!	#NULL!	#NULL!	#NULL!
2	2	F11	3	3	2	4	3	3	5	3	4	3	3	3	4	3	3	3	4	3	29	30	59	3.22222	3.33333	3.27778
2	2	F12	2	5	2	6	2	6	6	4	5	2	3	4	6	3	2	6	0	1	28	37	65	3.11111	4.11111	3.61111
2	2	F13	3	6	6	6	6	5	6	6	2	3	5	3	3	2	1	6	3	2	32	42	74	3.55556	4.66667	4.11111
2	2	F14	2	2	3	6	6	2	6	1	4	2	3	3	6	2	2	6	5	2	28	35	63	3.11111	3.88889	3.5
2	2	F15	4	5	4	#NULL!	3	#NULL!	4	1	6	#NULL!	2	2	6	#NULL!	#NULL!	#NULL!	3	2	#NULL!	#NULL!	#NULL!	#NULL!	#NULL!	#NULL!
2	2	F16	4	4	4	5	4	4	0	3	4	0	5	0	4	5	5	6	4	3	28	36	64	3.11111	4	3.55556
2	2	F17	3	0	6	4	4	3	3	4	4	3	4	4	3	4	4	3	4	3	33	30	63	3.66667	3.33333	3.5
2	2	F18	3	3	4	6	4	4	3	3	3	3	3	3	4	3	2	4	4	3	30	32	62	3.33333	3.55556	3.44444
2	2	F19	1	3	1	4	3	4	6	3	5	3	3	4	5	0	1	2	4	3	27	28	55	3	3.11111	3.05556
2	2	F20	3	4	5	4	5	3	5	4	4	3	4	5	4	3	3	5	3	3	34	36	70	3.77778	4	3.88889
2	2	F21	3	4	3	6	3	6	4	3	4	3	4	4	4	4	1	1	1	3	30	31	61	3.33333	3.44444	3.38889
2	2	F22	4	6	4	4	5	0	2	2	4	2	5	5	4	2	5	6	2	2	33	31	64	3.66667	3.44444	3.55556
2	2	F23	6	4	5	6	6	6	6	4	6	4	6	6	5	4	4	6	2	5	47	44	91	5.22222	4.88889	5.05556
2	2	F24	1	3	5	4	3	4	4	4	0	0	3	3	4	3	5	3	4	4	24	33	57	2.66667	3.66667	3.16667
2	2	F25	2	3	5	6	1	2	2	5	3	3	4	2	5	3	3	4	5	6	31	33	64	3.44444	3.66667	3.55556
2	2	F26	2	3	5	6	1	2	2	5	3	3	4	2	5	3	3	4	5	6	31	33	64	3.44444	3.66667	3.55556
2	2	F27	4	5	3	6	5	5	5	3	6	3	5	6	6	2	4	6	4	2	39	41	80	4.33333	4.55556	4.44444
2	2	F28	2	3	0	0	3	3	0	4	4	2	2	4	3	3	3	4	2	5	27	20	47	3	2.22222	2.61111
2	2	F29	2	3	4	4	4	3	3	3	4	3	4	2	4	4	5	1	2	3	30	28	58	3.33333	3.11111	3.22222
2	2	F30	3	2	3	3	6	6	6	5	1	6	6	5	1	4	4	6	6	2	35	40	75	3.88889	4.44444	4.16667
2	2	F31	4	4	6	5	5	5	6	4	6	3	4	6	6	3	3	6	3	3	39	43	82	4.33333	4.77778	4.55556
2	2	F32	3	2	2	3	0	2	3	3	5	3	2	3	5	3	3	2	4	3	26	25	51	2.88889	2.77778	2.83333
2	2	F33	1	3	1	4	4	5	4	4	4	4	4	4	3	0	3	4	0	4	32	24	56	3.55556	2.66667	3.11111
2	2	F34	2	3	6	6	6	6	6	4	4	4	6	6	6	4	3	6	6	4	39	49	88	4.33333	5.44444	4.88889
2	2	F35	5	4	5	4	4	5	6	2	5	0	5	4	4	3	2	5	5	5	31	42	73	3.44444	4.66667	4.05556
2	2	F36	4	3	3	4	4	4	4	4	4	3	3	4	4	2	3	2	3	4	34	28	62	3.77778	3.11111	3.44444
2	2	F37	5	4	3	4	3	5	5	3	4	3	4	3	6	2	2	6	4	1	28	39	67	3.11111	4.33333	3.72222
2	2	F38	1	1	4	4	3	4	4	4	6	1	4	4	6	4	1	4	4	1	25	35	60	2.77778	3.88889	3.33333
2	2	F39	3	3	1	4	4	4	4	3	4	3	4	4	6	4	1	4	4	1	27	34	61	3	3.77778	3.38889
2	2	F40	6	5	0	6	6	6	6	3	4	4	4	6	6	1	3	6	4	3	41	38	79	4.55556	4.22222	4.38889
2	2	F41	1	3	1	1	0	4	6	2	6	4	4	2	6	2	3	6	3	2	21	35	56	2.33333	3.88889	3.11111
2	2	F42	3	6	4	5	4	3	4	3	4	3	1	5	6	2	3	3	4	3	33	33	66	3.66667	3.66667	3.66667
2	2	F43	4	4	2	5	5	5	5	4	3	3	6	5	4	4	4	5	5	3	36	40	76	4	4.44444	4.22222
2	2	F44	4	3	4	4	4	4	4	4	4	3	4	4	4	3	4	4	3	3	34	33	67	3.77778	3.66667	3.72222
2	2	F45	5	4	5	6	4	5	4	3	5	2	4	4	6	2	4	4	1	2	35	35	70	3.88889	3.88889	3.88889
2	2	F46	2	1	2	4	6	6	3	3	4	2	3	3	6	4	2	6	3	2	28	34	62	3.11111	3.77778	3.44444
2	2	F47	3	3	3	3	3	3	2	4	6	2	2	4	5	4	2	5	5	3	30	32	62	3.33333	3.55556	3.44444
2	2	F48	3	2	2	3	#NULL!	2	3	3	4	3	2	#NULL!	#NULL!	1	#NULL!	2	3	3	#NULL!	#NULL!	#NULL!	#NULL!	#NULL!	#NULL!
2	2	F49	3	5	3	5	4	4	4	3	2	3	4	4	4	3	4	3	5	3	31	35	66	3.44444	3.88889	3.66667
2	2	F50	4	3	4	6	6	5	6	4	4	4	6	6	6	6	5	6	5	5	44	47	91	4.88889	5.22222	5.05556
2	2	F51	6	5	6	4	5	6	6	3	5	4	6	6	6	6	3	6	2	3	39	49	88	4.33333	5.44444	4.88889
2	2	F52	1	1	3	3	3	3	3	3	4	3	3	3	4	3	3	3	4	3	26	27	53	2.88889	3	2.94444
2	2	F53	3	4	2	4	4	3	3	2	3	3	3	2	3	3	3	2	4	3	27	27	54	3	3	3
2	2	F54	3	3	2	3	5	5	6	4	0	3	4	4	4	3	3	3	3	4	29	33	62	3.22222	3.66667	3.44444
2	2	F55	3	4	2	4	6	3	4	4	4	4	3	4	4	3	4	3	4	3	36	30	66	4	3.33333	3.66667
2	2	F56	2	6	2	0	4	3	4	4	4	4	3	4	4	3	4	3	4	3	29	32	61	3.22222	3.55556	3.38889
2	2	F57	3	0	4	2	4	6	2	3	0	0	4	1	5	4	5	2	3	1	19	30	49	2.11111	3.33333	2.72222
2	2	F58	1	2	0	2	1	2	1	2	6	2	1	2	6	2	1	1	6	1	18	21	39	2	2.33333	2.16667
2	2	F59	4	2	1	3	5	3	4	2	2	5	4	3	6	1	1	1	6	1	26	28	54	2.88889	3.11111	3
